# Supplementary material
Source: Springer Nature journal article supplement (https://www.springermedizin.de/resource/supplementary/12984_2008_199_MOESM5_ESM.pdf/9605512)

a) Participant 1, Site L4, Positive

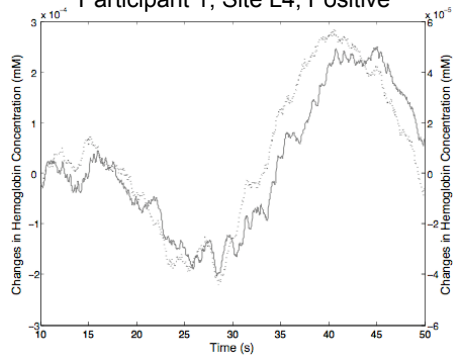

b) Participant 2, Site L4, Positive

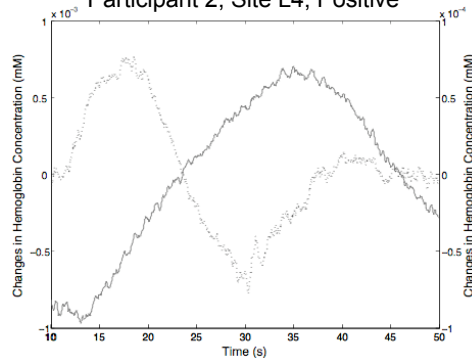

c) Participant 3, Site L4, Positive

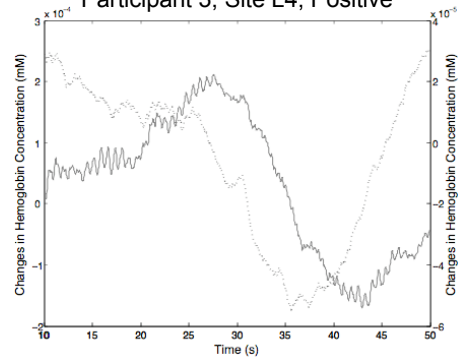

d) Participant 1, Site L4, Negative

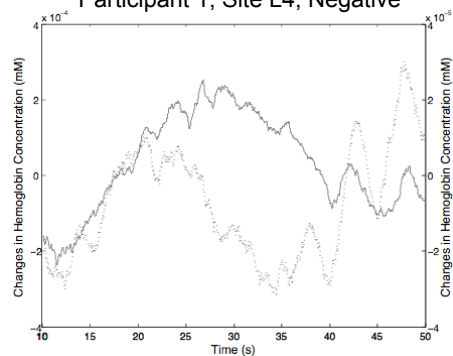

e) Participant 2, Site L4, Negative

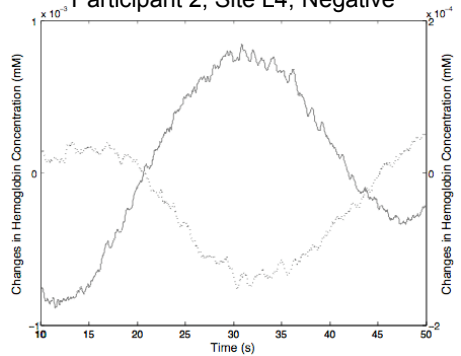

f) Participant 3, Site L4, Negative

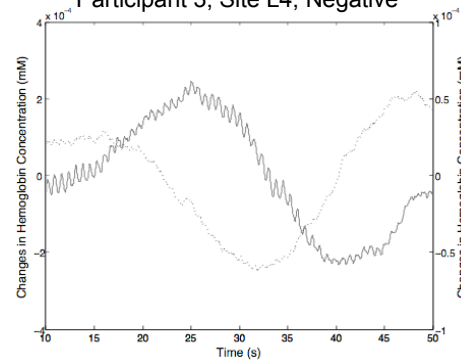

Supplement: MOESM5 [file 9605512]
